# Supplementary material
Source: PubMed Central journal article supplement (PMC4867910)
Supplement: mmc1.pdf [file mmc1.pdf]

**The American Journal of Human Genetics, Volume 98**

**Supplemental Data**

**Biallelic Mutations in *GNB3* Cause  
a Unique Form of Autosomal-Recessive  
Congenital Stationary Night Blindness**

**Ajoy Vincent, Isabelle Audo, Erika Tavares, Jason T. Maynes, Anupreet Tumber, Thomas Wright, Shuning Li, Christelle Michiels, Christel Condroyer, Heather MacDonald, Robert Verdet, José-Alain Sahel, Christian P. Hamel, Christina Zeitz, Elise Héon, and GNB3 Consortium**

## **Supplemental Data:**

### **Supplemental Methods:**

#### **Whole exome sequencing and analysis pipeline:**

Briefly,  $2 \times 100$ bp paired end sequencing was done using the Illumina Hi-Seq 2500 platform after target enrichment of 3 $\mu$ g of genomic DNA using the Agilent SureSelect Human Exome Library V5 kit followed by an in house standardized pipeline analysis. Overall mean exon coverage in trio-1 was 87-111X with >20X target base coverage of 96-97%. Overall mean exon coverage in trio-2 was 68-131X with >20X base coverage of 92-97%. Sequence reads were trimmed, and subsequently aligned to the reference human genome (hg 19/GRCh 37) using Burrows-Wheelchair aligner.<sup>1;2</sup> PCR duplicate reads were removed (MarkDuplicates, Picard tools v.1.112) and local realignment was performed (GATK 3.2.2). GATK haplotype caller3.2.2 was used to annotate single nucleotide variants (SNVs) and insertions/deletions (indels).<sup>3;4</sup> Only variants with minor allele frequency  $\leq 0.01$  reported in external and internal databases [NHLBI Exome Sequencing Project (ESP) Exome Variant Server; 1,000 genomes; dbSNP; Exome Aggregation Consortium (ExAC); and Complete Genomics (CG) control database (54 exomes)] were retained. Pathogenic prediction was performed using six different tools that included Polyphen-2, SIFT, mutation taster, combined annotation-dependent depletion Phred, and conservation values amongst PhyloP placental mammals and PhyloP 100-vertebrates.<sup>5-9</sup>

### **Supplemental Results:**

#### **Full-field electroretinogram (ERG):**

The ERG assessments of families A and B were done at separate sites using comparable basic International Society for Clinical electrophysiology of Vision (ISCEV) protocols. The amplitude

and implicit time data of standard ERG responses obtained from affected members are detailed in supplemental table (Table S3). The DA 0.01 ERG b-wave showed moderate (n=2; sib-ship from Family A) to severe (n=2; II-5 from Family A and proband from family B) amplitude reduction. The DA3.0 ERG showed normal a-wave and reduced b-wave in all four cases. The bright-flash DA10.0 ERG was electronegative (b/a <1) in all three tested individuals. These findings suggest partial (sib-ship; p.Lys57del/p.Trp339\*) or severe rod ON-bipolar dysfunction (2 cases; p.Trp339\*/p.Trp339\*; p.Ser67Phe/ p.Ser67Phe). Flicker ERG (LA3.0 30Hz) showed normal amplitude and implicit-time in the sib-ship; delayed implicit-timing with near normal amplitudes were noted in two subjects (II-5, Family A, p.Trp339\*/p.Trp339\* and IV-3, Family B, p.Ser67Phe/p.Ser67Phe). The LA 3.0 single flash ERG results are detailed in the main text.

#### **Cone phototransduction sensitivity ( $S_c$ ) and Maximal amplitude ( $Rm_{p3}$ ) measurement:**

After pupil dilatation (right eye) and ten minute light adaptation, Case-II-5 (Family A) was tested using a series of four bright white flashes (25, 63, 157 and 241 cd.s.m<sup>-2</sup>) under a rod saturating (30.0 cd.m<sup>-2</sup>) background. Burian-Allen electrodes were used for the recording; at each step, five or more reproducible traces were averaged. Pupils measured 9mm after the testing. The cone sensitivity ( $S_c$ ) and maximal cone photoreceptor amplitude ( $Rm_{p3}$ ) were calculated as described.<sup>10; 11</sup> In brief, equation 1 was fitted to the initial 12 ms of the waveforms obtained from the 4 flash intensities using a grid search algorithm.

$$P3(i, t) = \left\{ \frac{i \cdot S_c \cdot (t - t_d)^3}{i \cdot S_c \cdot (t - t_d)^3 + 1} \right\} \cdot Rm_{p3} \quad (\text{Equation 1})$$

Where  $i$  = intensity (log scotopic trolands),  $t$  = time (ms),  $S_c$  = Sensitivity (td·s<sup>-1</sup>·sec<sup>-3</sup>),  $t_d$  = time delay (ms) and  $Rm_{p3}$  = maximal cone photoreceptor amplitude (μV). To determine  $t_d$ , waveforms from the control subjects were fitted allowing all 3 parameters ( $S_c$ ,  $Rm_{p3}$  and  $t_d$ ) to vary; modal

value of  $t_d$  (2.2 ms) was then used to fit all control and patient data. Case II-5 had  $Rm_{p3}$  of  $-97\mu V$  (Normal Range:  $-74 - -103 \mu V$ );  $S_c$  was reduced [ $\log(S_c)$ ] = 0.83 (Normal Range: 1.59 – 2.17).

Supplemental Table 1: The filtering steps used in the analysis of WES data from Family A

| Filtering Steps                                                                                                                                                     | Total Variants /Genes     |                           | Shared Genes                             |
|---------------------------------------------------------------------------------------------------------------------------------------------------------------------|---------------------------|---------------------------|------------------------------------------|
|                                                                                                                                                                     | Case III -2               | Case II-5                 |                                          |
| <b>Total Variants</b>                                                                                                                                               | 95,306                    | 93,262                    |                                          |
| <b>Coding sequence and splicing Variants</b>                                                                                                                        | 21,496                    | 20,201                    |                                          |
| <b>Non-synonymous Coding Variants and splicing Variants</b>                                                                                                         | 9,721                     | 9,632                     |                                          |
| <b>Variants with Allele frequency <math>\leq 0.01</math> in public databases</b>                                                                                    | 515                       | 461                       |                                          |
| <b>Genes with <math>\geq 2</math> variants</b>                                                                                                                      | 42 genes<br>(73 variants) | 30 genes<br>(48 variants) | 13 genes<br>(18 variants)                |
| <b>Genes remaining after removal of homozygous variants in affected, if present in homozygous state in unaffected parents</b>                                       | 33 genes<br>(64 variants) | 22 genes<br>(40 variants) | 6 genes<br>(11 variants)                 |
| <b>Genes remaining after removal of heterozygous variants in affected, if present in homozygous state in unaffected parents</b>                                     | 32 genes<br>(62 variants) | 21 genes<br>(38 variants) | 6 genes<br>(11 variants)                 |
| <b>Genes remaining after removal of homozygous or compound heterozygous variants shared between Case II-5 (affected) and Case II-4 (unaffected sibling of II-5)</b> | 32 genes<br>(62 variants) | 10 genes<br>(18 variants) | 1 gene (1 variant)<br><b><i>GNB3</i></b> |

Supplemental Table 2: Summary of the clinical phenotype in the two families

| Family | Case<br>(Sex, Age)<br>Mutation          | BCVA<br>RE:<br>LE | Refractive Error<br>RE:LE               | Color Vision                                                          | CS<br>RE:LE   | Visual Field                                   | Comment                                                                                                                                                          |
|--------|-----------------------------------------|-------------------|-----------------------------------------|-----------------------------------------------------------------------|---------------|------------------------------------------------|------------------------------------------------------------------------------------------------------------------------------------------------------------------|
| A      | III-2 (M, 7yr)<br>p.Lysdel57/p.Trp339*  | 20/25:<br>20/30   | +2.25/-0.75 x 30°:<br>+2.00/-0.75 x 20° | Normal RG & BY<br>(HRR)                                               | 1.50:<br>1.50 | I4e target – 105° BE<br>III4e target – 130° BE | Night-blindness since childhood                                                                                                                                  |
|        | III-1 (M, 13yr)<br>p.Lysdel57/p.Trp339* | 20/25:<br>20/25   | Plano: Plano                            | Normal RG & BY<br>(HRR)                                               | 1.65:<br>1.80 | I4e target – 100° BE<br>III4e target – 125° BE | Asymptomatic                                                                                                                                                     |
|        | II-5 (F, 48yr)<br>p.Trp339*/p.Trp339*   | 20/30:<br>20/25   | -1.50/-1.00 x 70°:<br>-1.50/-1.50 x 90° | Mild RG deficit,<br>Normal BY (HRR)                                   | 1.35:<br>1:35 | I4e target – 100° BE<br>III4e target – 130° BE | Night-blindness since childhood,<br>Photophobia – recent                                                                                                         |
| B      | IV-3 (F, 65yr)<br>p.Ser67Phe/p.Ser67Phe | 20/25:<br>20/25   | +2.50/-4.50 x 95°:<br>+2.50/-5.00 x 75° | Normal (saturated<br>D15); Moderate BY<br>deficit (unsaturated<br>D15 | NA            | IIIc target – 120° RE<br>IIIc target – 115° LE | Night blindness since childhood; photophobia<br>since thirties; Late onset (55 years) cerebellar<br>ataxia and peripheral neuropathy of<br>undetermined etiology |

Abbreviations: RE – right eye; LE – left eye; BE – both eyes; BCVA – best-corrected visual acuity; CS – contrast sensitivity; HRR –

Hardy Rand Rittler; RG – red-green; BY – blue-yellow; NA – not available; GVF – Goldmann visual fields.

Supplemental Table 3: Detailed Electroretinogram phenotype in the two families

| Family                 | Case<br>(Age/<br>Age Range) | Eye | DA 0.01<br>b-wave<br>Amp | DA 3.0<br>a-wave<br>Amp | DA 3.0<br>b-wave<br>Amp | DA 3.0<br>b:a | DA 10.0<br>b:a | LA 3.0<br>a-wave<br>IT | LA 3.0<br>a-wave<br>Amp | LA 3.0<br>b-wave<br>IT | LA 3.0<br>b-wave<br>Amp | LA 30<br>Hz<br>IT | LA 30 Hz<br>Amp |
|------------------------|-----------------------------|-----|--------------------------|-------------------------|-------------------------|---------------|----------------|------------------------|-------------------------|------------------------|-------------------------|-------------------|-----------------|
| A                      | III-2 (11yr)                | RE  | 73                       | 183                     | 214                     | 1.17          | 0.94           | 17                     | 48                      | 31                     | 179                     | 29                | 237             |
|                        |                             | LE  | 58                       | 186                     | 228                     | 1.23          | 0.89           | 16                     | 42                      | 31                     | 180                     | NA                | NA              |
|                        | III-1 (13yr)                | RE  | 68                       | 165                     | 208                     | 1.26          | 0.98           | 17                     | 56                      | 31                     | 165                     | 29                | 210             |
|                        |                             | LE  | 59                       | 181                     | 233                     | 1.28          | NA             | NA                     | NA                      | NA                     | NA                      | 29                | 149             |
|                        | II-5 (48yr)                 | RE  | 0                        | 252                     | 179                     | 0.71          | 0.73           | 24                     | 36                      | 36                     | 86                      | 35                | 86              |
| B                      | IV-3 (65yr)                 | RE  | 0                        | 173                     | 139                     | 0.80          | NA             | 31                     | 100                     | 49                     | 96                      | 33                | 88              |
|                        |                             | LE  | 0                        | 158                     | 126                     | 0.80          | NA             | 34                     | 93                      | 49                     | 79                      | NA                | NA              |
| Control (Normal Range) |                             | EI  | 161 - 430                | 172 - 440               | 296 - 652               | 1.36 - 2.98   | 1.33 - 2.07    | 14 - 17                | 25 - 62                 | 27 - 30                | 119 - 232               | 25 - 29           | 89 - 184        |

Abbreviations: RE – right eye; LE – left eye; EI – either eye (only one eye data was included); DA – dark adapted; LA – light adapted;

Amp – amplitude ( $\mu\text{V}$ ); IT – implicit time (ms); NA – not available.

## Supplemental References:

1. Bolger, A.M., Lohse, M., and Usadel, B. (2014). Trimmomatic: a flexible trimmer for Illumina sequence data. *Bioinformatics* 30, 2114-2120.
2. Li, H., and Durbin, R. (2010). Fast and accurate long-read alignment with Burrows-Wheeler transform. *Bioinformatics* 26, 589-595.
3. DePristo, M.A., Banks, E., Poplin, R., Garimella, K.V., Maguire, J.R., Hartl, C., Philippakis, A.A., del Angel, G., Rivas, M.A., Hanna, M., et al. (2011). A framework for variation discovery and genotyping using next-generation DNA sequencing data. *Nature genetics* 43, 491-498.
4. McKenna, A., Hanna, M., Banks, E., Sivachenko, A., Cibulskis, K., Kernytsky, A., Garimella, K., Altshuler, D., Gabriel, S., Daly, M., et al. (2010). The Genome Analysis Toolkit: a MapReduce framework for analyzing next-generation DNA sequencing data. *Genome research* 20, 1297-1303.
5. Adzhubei, I.A., Schmidt, S., Peshkin, L., Ramensky, V.E., Gerasimova, A., Bork, P., Kondrashov, A.S., and Sunyaev, S.R. (2010). A method and server for predicting damaging missense mutations. *Nature methods* 7, 248-249.
6. Kumar, P., Henikoff, S., and Ng, P.C. (2009). Predicting the effects of coding non-synonymous variants on protein function using the SIFT algorithm. *Nature protocols* 4, 1073-1081.
7. Kircher, M., Witten, D.M., Jain, P., O'Roak, B.J., Cooper, G.M., and Shendure, J. (2014). A general framework for estimating the relative pathogenicity of human genetic variants. *Nature genetics* 46, 310-315.
8. Schwarz, J.M., Cooper, D.N., Schuelke, M., and Seelow, D. (2014). MutationTaster2: mutation prediction for the deep-sequencing age. *Nature methods* 11, 361-362.
9. Pollard, K.S., Hubisz, M.J., Rosenbloom, K.R., and Siepel, A. (2010). Detection of nonneutral substitution rates on mammalian phylogenies. *Genome research* 20, 110-121.
10. Hood, D.C., and Birch, D.G. (1995). Phototransduction in human cones measured using the alpha-wave of the ERG. *Vision research* 35, 2801-2810.
11. Birch, D.G., Hood, D.C., Locke, K.G., Hoffman, D.R., and Tzekov, R.T. (2002). Quantitative electroretinogram measures of phototransduction in cone and rod photoreceptors: normal aging, progression with disease, and test-retest variability. *Arch Ophthalmol* 120, 1045-1051.
